# Supplementary material
Source: Royal Society of Chemistry journal article supplement (doi:10.1039/d6se00361c)
Supplement: d6se00361c1.pdf [file d6se00361c1.pdf]

## Electronic Supplementary Information

# Integrated Recycling of Polylactide using Biomass into Renewable Fuels: A Combined Experimental and Computational Design Approach.

Moreno Ascani,<sup>‡a</sup> Lisa Burkart,<sup>‡b</sup> Philipp Ackermann,<sup>a</sup> Tabea Becker,<sup>b</sup> Marian Panofen,<sup>a</sup> Alexander Mitsos,<sup>acd</sup> and Sonja Herres-Pawlis<sup>\*b</sup>

- a) Process Systems Engineering (AVT.SVT), RWTH Aachen University, 52074 Aachen, Germany.
- b) Institute of Inorganic Chemistry, RWTH Aachen University, Aachen (Germany).
- c) Forschungszentrum Jülich GmbH, Institute of Climate and Energy Systems, Energy Systems Engineering (ICE-1), 52425 Jülich, Germany.
- d) JARA-ENERGY, 52056 Aachen, Germany.

\* Correspondence: Prof. Dr. Sonja Herres-Pawlis, Institute of Inorganic Chemistry, RWTH Aachen University, Landoltweg 1a, 52074 Aachen (Germany). E-mail: [sonja.herres-pawlis@ac.rwth-aachen.de](mailto:sonja.herres-pawlis@ac.rwth-aachen.de)

‡ These authors contributed equally to this work.

## Table of contents

|       |                                                                           |    |
|-------|---------------------------------------------------------------------------|----|
| 1.    | Analytic methods                                                          | 5  |
| 1.1.  | Nuclear Magnetic Resonance Spectroscopy                                   | 5  |
| 1.2.  | Elemental analysis (EA)                                                   | 5  |
| 1.3.  | Infrared Spectroscopy (IR)                                                | 5  |
| 1.4.  | ESI-HRMS                                                                  | 5  |
| 1.5.  | General experimental information                                          | 5  |
| 2.    | General procedure for the alcoholysis                                     | 6  |
| 2.1.  | Depolymerization of PLA in THF (GP1)                                      | 6  |
| 2.2.  | Depolymerization of PLA under solvent-free conditions (GP2)               | 6  |
| 2.3.  | Depolymerization of PLA under inert and solvent-free conditions (GP2*)    | 6  |
| 3.    | Evaluation of the alcoholysis and glycolysis of PLA                       | 6  |
| 3.1.  | Proposed mechanism                                                        | 6  |
| 3.2.  | Determination of $X_{int}$ , $S_{RLa}$ , and $Y_{RLa}$                    | 6  |
| 4.    | Synthesis and Characterization of Me <sub>2</sub> BuLa                    | 7  |
| 4.1.  | Synthesis of Me <sub>2</sub> BuLa (2.00 g scale)                          | 7  |
| 5.    | Alcoholysis and Glycolysis of PLA using TMG <sub>2</sub> e and <b>Zn1</b> | 8  |
| 5.1.  | Methyl lactate (MeLa; GP1+GP2)                                            | 8  |
| 5.2.  | Ethyl lactate (EtLa; GP1+GP2)                                             | 8  |
| 5.3.  | Propyl lactate (PrLa; GP1+GP2)                                            | 9  |
| 5.4.  | Propyl lactate (PrLa; GP2*)                                               | 9  |
| 5.5.  | Butyl lactate (BuLa; GP1+GP2)                                             | 10 |
| 5.6.  | Pentyl lactate (PeLa; GP1+GP2)                                            | 10 |
| 5.7.  | Hexyl lactate (HeLa; GP1+GP2)                                             | 11 |
| 5.8.  | Octyl lactate (Ocla; GP1+GP2)                                             | 11 |
| 5.9.  | Octyl lactate (Ocla; GP2*)                                                | 12 |
| 5.10. | <i>iso</i> -Propyl lactate ( <i>i</i> PrLa; GP2)                          | 12 |
| 5.11. | <i>iso</i> -Propyl lactate ( <i>i</i> PrLa; GP2*)                         | 13 |
| 5.12. | <i>iso</i> -Butyl lactate ( <i>i</i> BuLa; GP1+GP2)                       | 13 |
| 5.13. | 3,3-Dimethylbutyl lactate (Me <sub>2</sub> BuLa; GP1+GP2)                 | 14 |
| 5.14. | <i>tert</i> -Butyl lactate ( <i>t</i> BuLa; GP2)                          | 14 |
| 5.15. | Pentan-3-yl 2-hydroxypropanoate (3PeLa; GP1+GP2)                          | 15 |
| 5.16. | Allyl lactate (Alla; GP1+GP2)                                             | 15 |
| 5.17. | Benzyl lactate (BnLa; GP1+GP2)                                            | 16 |

|       |                                                              |    |
|-------|--------------------------------------------------------------|----|
| 5.18. | 2-Hydroxyethyl 2-hydroxypropanoate (EGLa; GP2)               | 16 |
| 6.    | Results for the depolymerization of PLA                      | 18 |
| 6.1.  | Depolymerization using TMG <sub>2</sub> e following GP1      | 18 |
| 6.2.  | Depolymerization using TMG <sub>2</sub> e following GP2      | 19 |
| 6.3.  | Depolymerization using Zn1 following GP2*                    | 20 |
| 7.    | New data used in the RNFA analysis                           | 20 |
| 8.    | Production pathways present in the results shown in Figure 5 | 21 |
| 9.    | Product library                                              | 22 |
| 10.   | References                                                   | 24 |

# 1. Analytic methods

## 1.1. Nuclear Magnetic Resonance Spectroscopy

NMR spectra were recorded on a Bruker Avance III HD 400 and a Bruker Avance II 400 nuclear resonance spectrometer at 25°C. Resonances were referenced to the residual solvent signal, relative to TMS. Data in the  $^1\text{H}$  and  $^{13}\text{C}$  NMR spectra are stated as follows: chemical shift ( $\delta$  in ppm) (multiplicity, coupling constant ( $J$  in Hz), integration). To describe the multiplicity of the signals the following abbreviations are used: s = singlet, d = doublet, t = triplet, q = quartet, m = multiplet or combinations thereof. For a more detailed analysis of the signals various 2D NMR experiments (COSY, HSQC, HMBC) were conducted. Hydrogen and carbon atoms of all molecules are consecutively numbered for a clear and simple classification. For the Bruker Avance III HD 400 the software Topspin (Version 3.5.7) from Bruker and for the Bruker Avance III neo 400 the software TopSpin (Version 4.5.0) from Bruker were used for data acquisition. For visualization and examination of the NMR spectra the software MestReNova (Version 14.2.3-29241) from Mestrelab Research was used.

## 1.2. Elemental analysis (EA)

Elemental analysis was conducted with an elementar vario EL and an elementar vario EL cube.

## 1.3. Infrared Spectroscopy (IR)

FT-IR spectra were recorded with a Shimadzu IRTracer 100 using a CsI beam splitter in combination with an ATR unit (Quest model from Specac utilizing a robust monolithic crystalline diamond) in a  $2\text{ cm}^{-1}$  resolution. For data acquisition, the software LabSolution IR (Version 2.15) from Shimadzu was used. The obtained IR data are stated as reciprocal wave numbers of the absorption ( $\text{cm}^{-1}$ ). The vibration bands of the spectra are characterized *via* the Chemotion electronic lab notebook (ELN) as follows: vw = very weak, w = weak, m = medium, s = strong and vs = very strong.

## 1.4. ESI-HRMS

ESI mass spectra were obtained with a *ThermoFisher* Scientific LTQ Orbitrap XL. The source voltage was 4.49 kV, the capillary temperature amounted to 299.54 °C. The tube lens voltage lay between 110 and 130 V.

## 1.5. General experimental information

The chemicals used were commercially available from Acros Organics, Sigma Aldrich GmbH, TCI GmbH, and Alfa Aesar and used as received. If not stated otherwise, the reactions were performed in contact with air. If needed, solvents and the alcohols used were dried according to literature. The used polymers were provided by bio-mi Ltd. (Croatia). PLA powder ( $M_n = 56.6\text{ kg mol}^{-1}$ ) was cryo-milled to 0.75 mm by the Leibniz Institute for Natural Product Research and Infection Biology - Hans Knöll Institute (HKI, Germany). The bisguanidine organocatalyst TMG<sub>2</sub>e was synthesized according to literature.<sup>[1-3]</sup> The zinc bisguanidine catalyst  $[\text{Zn}(\text{DMEG}_2\text{ch})_2](\text{OTf})_2 \cdot \text{THF}$  (**Zn1**) was synthesized according to literature.<sup>[4]</sup> The experiments conducted are available *via* the Chemotion repository including the obtained data and additional information at [10.14272/collection/LB\\_2025-09-05](https://doi.org/10.14272/collection/LB_2025-09-05).

Table S1: Supplier of the used nucleophiles and solvents.

| Chemical               | Supplier          | Purity                 |
|------------------------|-------------------|------------------------|
| Tetrahydrofuran (THF)  | Fisher scientific | Synthesis grade        |
| Methanol               | Fisher scientific | Synthesis grade        |
| Ethanol                | VWR Chemicals     | Analytic reagent grade |
| Ethylene glycol        | Alfa Aesar        | 99%                    |
| Allyl alcohol          | Sigma Aldrich     |                        |
| Propanol               | Thermo scientific | 99.9%                  |
| <i>iso</i> -Propanol   | Thermo scientific | 99%                    |
| Butanol                | Sigma Aldrich     | 99.8%                  |
| <i>iso</i> -Butanol    | Sigma Aldrich     | 99.5%                  |
| <i>tert</i> -Butanol   | Sigma Aldrich     |                        |
| Pentanol               | Thermo scientific | 99%                    |
| 3-Pentanol             | Thermo scientific | 98%                    |
| Hexanol                | Thermo scientific | 99%                    |
| 3,3-Dimethyl-1-butanol | Thermo scientific | 97%                    |
| Benzyl alcohol         | Sigma Aldrich     | 99.8%                  |
| Octanol                | Thermo scientific | 99%                    |

## 2. General procedure for the alcoholysis

### 2.1. Depolymerization of PLA in THF (GP1)

For the depolymerization in THF, PLA (1.00 equiv) and catalyst (1.0 mol%) were provided in a Young-type Schlenk tube and dissolved in THF (4 mL) using an external heat source (80 °C). The reaction tube was placed in a preheated oil bath (60 °C, stirring speed = 260 rpm) and the reaction was started by the addition of the used nucleophile (7 equiv). The reaction was monitored using <sup>1</sup>H NMR spectroscopy. Catalytic reactions using TMG<sub>2</sub>e were performed under air and with synthetic grade solvents and reactants.

### 2.2. Depolymerization of PLA under solvent-free conditions (GP2)

For the depolymerization under solvent-free conditions, PLA (1.00 equiv), catalyst (1.0 mol%) and the used nucleophile (7 equiv) were provided in a Young-type Schlenk tube. The reaction tube was placed in a preheated oil bath (150 °C, stirring speed = 260 rpm) to start the reaction. The reaction was monitored using <sup>1</sup>H NMR spectroscopy. Samples were taken by cooling the tube to room temperature under running water to collect a sample. Subsequently, the reaction tube was placed into the oil bath to restart the reaction. Catalytic reactions using TMG<sub>2</sub>e were performed under air and with synthetic grade solvents and reactants. Under these conditions, we observed the low formation of other not identified oligomeric species.

### 2.3. Depolymerization of PLA under inert and solvent-free conditions (GP2\*)

In a N<sub>2</sub> filled glovebox, [Zn(DMEG<sub>2</sub>ch)<sub>2</sub>](OTf)<sub>2</sub> · THF (**Zn1**, 1.0 mol%, regarding the ester bonds, synthesized according to literature<sup>[5]</sup>) was weighed into a Young-type Schlenk tube. PLA (3.47 mmol, 1.00 equiv, bio-mi Ltd.) was added in N<sub>2</sub> counterflow. To start the depolymerization, the respective alcohol (24.3 mmol, 7 equiv) was added under N<sub>2</sub> counterflow, the Young-type Schlenk tube was placed in an oil bath preheated to 150 °C and stirred with a magnetic stirrer at 260 rpm.

## 3. Evaluation of the alcoholysis and glycolysis of PLA

### 3.1. Proposed mechanism

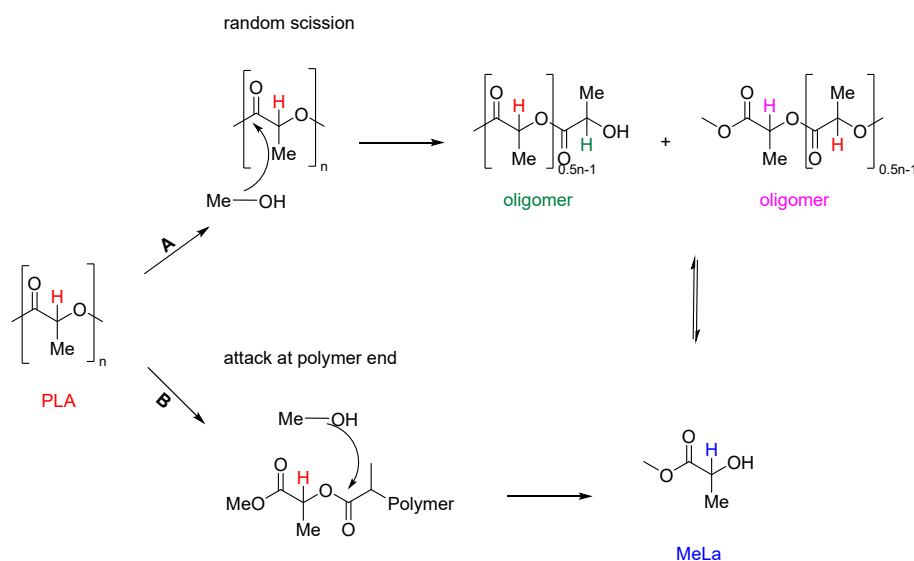

Scheme S1 Proposed mechanism for the depolymerization of PLA using methanol as example under **GP1** conditions (Pathway A). Using smaller alcohols under **GP2** conditions can lead to a change of reaction mechanism to Pathway B. Larger nucleophiles such as BnOH follow Pathway B under **GP1** and **GP2**. For other nucleophiles we found that oligomer formation occurs (Pathway A) under the conditions of **GP2**.

### 3.2. Determination of $X_{\text{int}}$ , $S_{\text{RLa}}$ , and $Y_{\text{RLa}}$

The catalytic experiments were analyzed using <sup>1</sup>H NMR spectroscopy and the products were not isolated. MeLa, PrLa, BuLa, *i*BuLa, PrLa, PeLa, HeLa, and OcLa were analyzed according to literature.<sup>[6-8]</sup> ELa could not be analyzed according to literature due to overlap of the signal of the internal methine group of PLA and the OH signal of ELa. Instead, the doublet for the methyl group of the lactate moiety was analyzed. Due to the overlap of the signals of the methine proton of EtLa and Me<sub>2</sub>BuLa and the signals of the protons of the alcohol moiety of one of the oligomer chain-ends, the integral for EtLa and Me<sub>2</sub>BuLa were calculated according to literature.<sup>[6, 9]</sup> For BnLa, the signal for the internal methine group of PLA (Int) is overlapped by the CH<sub>2</sub> group of the benzylic residue (BnCH<sub>2</sub>OR); thus, the amount of PLA ([Int]) was calculated by subtracting the protons of the CH<sub>2</sub> units from the overlapped integral of PLA and BnLa using the equation S1. The amount of CH<sub>2</sub> units was determined by using the integral of the methine signal of BnLa (BnLa). Due to <sup>13</sup>C satellites and the fast depolymerization of PLA this method is not quantitative.

$$Int = (Int + BnCH_2OR) - (2 \cdot (BnLa)) \quad (S1)$$

Alla could only be analyzed after complete conversion of PLA was reached due to the overlap of PLA and signals from the AIOH. For BnLa, the signal for the internal methine group of PLA (Int) is overlapped not only by the oligomer but by the methine signal of the *iso*-propyl residue of the oligomer and the *i*PrLa; thus, the ratio of PLA ([Int]) was calculated by subtracting the integral of the oligomers as described in literature. Further, the integrals of the oligomer and the *i*PrLa were subtracted from the integral at 5.2 ppm to amount for the additional protons of the methine group of the *i*-propyl residue. To obtain [Int] the calculated integral needs to be divided by the sum of the methine signals of the (former) internal methine group of PLA, oligomers, and *i*PrLa.

$$[Int] = \frac{Int - 2 \cdot oligomers - iPrLa}{Int + oligomer + iPrLa - oligomer - iPrLa} \quad (S2)$$

Furthermore, depolymerizations using *t*BuOH and 3PeOH were not successful. We observed several oligomeric species which were not identified further.

The conversion of PLA ( $X_{int}$ ), the selectivity towards the lactate ( $S_{RLa}$ ), and the yield of the lactate ( $Y_{RLa}$ ) were determined according to literature.<sup>[6-7]</sup>

$$X_{int} = \frac{[Int]}{[Int]_0} \quad (S3)$$

$$S_{RLa} = \frac{[RLa]}{[Int]_0 - [Int]} \quad (S4)$$

$$Y_{RLa} = X_{int} \cdot S_{RLa} \quad (S5)$$

$$[Int]_0 = [Int] + [oligomers] + [RLa] \quad (S6)$$

## 4. Synthesis and Characterization of Me<sub>2</sub>BuLa

3,3-Dimethylbutyl 2-hydroxypropanoate (Me<sub>2</sub>BuLa) was synthesized in a 500 mg PLA and a 2.00 g PLA scale to isolate characterize the compound, since no sources of reliable spectroscopic data could be identified. For the 500 mg scale alcoholysis, the reaction was performed as described for a 250 mg scale. For the 2.00 g scale alcoholysis, the reaction conditions were adjusted to larger reaction volume.

### 4.1. Synthesis of Me<sub>2</sub>BuLa (2.00 g scale)

TMG<sub>2</sub>e (73.7 mg, 287 μmol, 0.0104 equiv), PLA powder (2.00 g, 27.8 mmol, 1.00 equiv), and 3,3-dimethylbutan-1-ol (8.44 g, 10.0 mL, 82.6 mmol, 2.98 equiv) were provided in a 50 mL Schlenk flask. The flask was equipped with a reflux condenser and placed in a preheated oil bath (150 °C, *t* = 0 min). A <sup>1</sup>H NMR sample was collected after 1.5 h, 24 h and 48 h. The reaction was performed under protective atmosphere. After 49 h, the reaction was stopped and the <sup>1</sup>H NMR spectroscopic analysis performed yielded a conversion of PLA of 100% and a yield for 3,3-dimethylbutyl 2-hydroxypropanoate (Me<sub>2</sub>BuLa) of 75%. All volatile compounds were removed in high vacuum and collected in a cooling trap (oil bath = 80–100 °C). Me<sub>2</sub>BuLa was separated from 3,3-dimethylbutan-1-ol using micro distillation. The obtained fraction contained Me<sub>2</sub>BuOH, which was removed in high vacuum (4·10<sup>-2</sup> mbar) at *T* = 80–140 °C. The yield of Me<sub>2</sub>BuLa was not determined.

**<sup>1</sup>H NMR** (400 MHz, CDCl<sub>3</sub>) δ = 4.25–4.15 (m, 3H, CHOH, CH<sub>2</sub>O), 3.08 (b, 1H, OH), 1.55 (t, *J* = 7.3 Hz, 2H, CH<sub>2</sub>CH<sub>2</sub>O), 1.37 (dd, *J* = 6.9 Hz, *J* = 0.8 Hz, 3H, CHCH<sub>3</sub>), 0.91 (d, *J* = 0.9 Hz, 9H, CH<sub>2</sub>(CH<sub>3</sub>)<sub>3</sub>) ppm.

**<sup>13</sup>C NMR** (100 MHz, CDCl<sub>3</sub>) δ = 175.9 (1C, C=O), 66.8 (1C, CHOH), 63.5 (1C, CH<sub>2</sub>CH<sub>2</sub>O), 41.8 (1C, CH<sub>2</sub>CH<sub>2</sub>O), 29.8 (3C, C(CH<sub>3</sub>)<sub>3</sub>), 29.6 (1C, C(CH<sub>3</sub>)<sub>3</sub>), 20.4 (1C, CHCH<sub>3</sub>) ppm.

**FTIR** (ATR,  $\tilde{\nu}$ ) = 3474 (O–H, w), 2959 (CH<sub>aliphatic</sub>, m), 2906 (CH<sub>aliphatic</sub>, w), 2870 (CH<sub>aliphatic</sub>, w), 1731 (C=O, vs), 1478 (CH<sub>aliphatic</sub>, w), 1466 (CH<sub>aliphatic</sub>, w), 1396 (CH<sub>aliphatic</sub>, w), 1367 (CH<sub>aliphatic</sub>, m), 1311 (w), 1262 (C–O, m), 1215 (C–O, vs), 1204 (C–O, vs), 1127 (C–O, vs), 1086 (C–O, m), 1044 (C–O, s), 964 (m), 928 (w), 864 (w), 761 (w) cm<sup>-1</sup>.

**HRMS** (ESI+, MeOH) *m/z* (%) calc for C<sub>9</sub>H<sub>18</sub>O<sub>3</sub>Na<sup>+</sup> ([M+Na]<sup>+</sup>) 197.11481, found 197.11414; calc for (C<sub>9</sub>H<sub>18</sub>O<sub>3</sub>)<sub>2</sub>Na<sup>+</sup> ([2M+Na]<sup>+</sup>) 371.24040, found 371.23941.

## 5. Alcoholysis and Glycolysis of PLA using TMG<sub>2</sub>e and Zn1

### 5.1. Methyl lactate (MeLa; GP1+GP2)

The alcoholysis was analyzed using <sup>1</sup>H NMR spectroscopy as described in literature.<sup>[6-7]</sup> The <sup>1</sup>H NMR spectroscopic data is in good accordance with literature.<sup>[6-7]</sup>

<sup>1</sup>H NMR (400 MHz, CDCl<sub>3</sub>) δ = 4.26 (q, *J* = 7.0 Hz, 1H, CH), 3.75 (s, 3H, OCH<sub>3</sub>), 1.39 (d, *J* = 6.8 Hz, 3H, CHCH<sub>3</sub>) ppm.

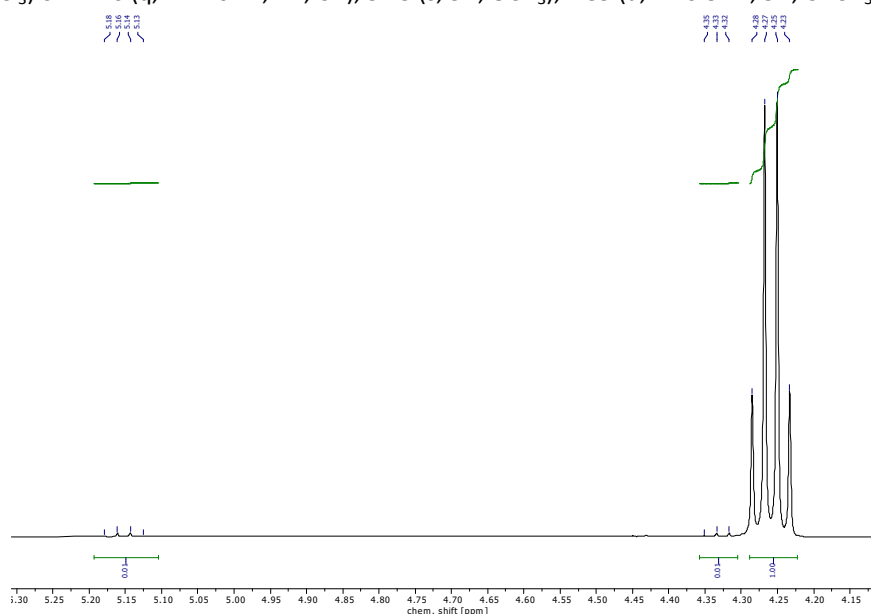

Figure S1. Exemplary <sup>1</sup>H NMR spectrum in CDCl<sub>3</sub> of the methanolysis of PLA after 5 min. Reaction conditions (GP2): 250 mg PLA, 1.0 mol% TMG<sub>2</sub>e, 7.1 equiv MeOH, 150 °C, 260 rpm.

### 5.2. Ethyl lactate (EtLa; GP1+GP2)

The alcoholysis was analyzed using <sup>1</sup>H NMR spectroscopy as described in literature.<sup>[10]</sup> The <sup>1</sup>H NMR spectroscopic data is in good accordance with literature.<sup>[9-10]</sup>

<sup>1</sup>H NMR (400 MHz, CDCl<sub>3</sub>) δ = 4.26 – 4.13 (m, 3H, CH + OCH<sub>2</sub>), 1.36 (d, *J* = 6.9 Hz, 3H, CHCH<sub>3</sub>), 1.25 (t, *J* = 7.2 Hz, 3H, CH<sub>2</sub>CH<sub>3</sub>) ppm.

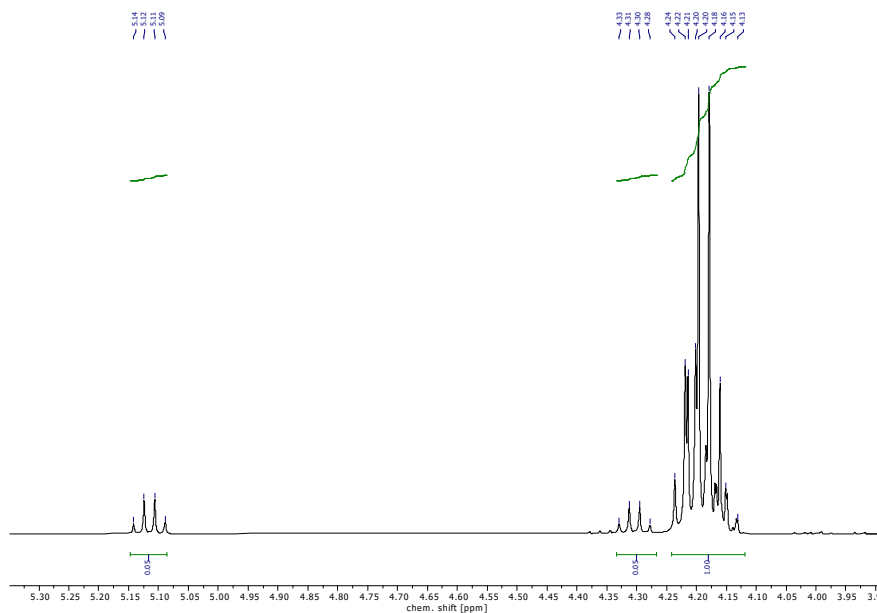

Figure S2. Exemplary <sup>1</sup>H NMR spectrum in CDCl<sub>3</sub> of the ethanolysis of PLA after 10 min. Reaction conditions (GP2): 250 mg PLA, 1.0 mol% TMG<sub>2</sub>e, 6.9 equiv EtOH, 150 °C, 260 rpm.

### 5.3. Propyl lactate (P<sub>1</sub>La; GP1+GP2)

The alcoholysis was analyzed using <sup>1</sup>H NMR spectroscopy as described in literature.<sup>[11]</sup> The <sup>1</sup>H NMR spectroscopic data is in good accordance with literature.<sup>[8, 11]</sup> The harsher conditions of **GP2** lead to the formation of unidentified depolymerization products which are observable after 48 h *via* <sup>1</sup>H NMR spectroscopy. This could be due to racemization of the lactates during the reactions or the formation of different oligomeric species. Under the conditions of **GP1**, the formation of side products was reduced successfully.

<sup>1</sup>H NMR (400 MHz, CDCl<sub>3</sub>) δ = 4.23 (q, *J* = 6.9 Hz, 1H, CH), 4.14 – 4.03 (m, 2H, OCH<sub>2</sub>), 1.69 – 1.60 (m, 2H, CH<sub>2</sub>CH<sub>2</sub>CH<sub>3</sub>), 1.38 (d, *J* = 6.9 Hz, 3H, CHCH<sub>3</sub>), 0.91 (t, *J* = 7.4 Hz, 3H, CH<sub>2</sub>CH<sub>3</sub>) ppm.

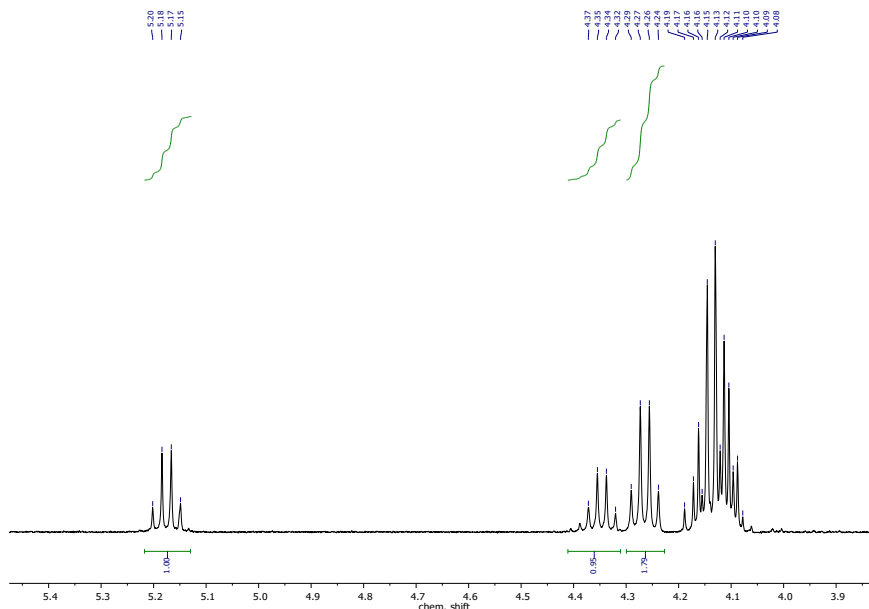

Figure S3. Exemplary <sup>1</sup>H NMR spectrum in CDCl<sub>3</sub> of the propanolysis of PLA after 1 h. Reaction conditions (**GP2**): 250 mg PLA, 1.0 mol% TMG<sub>2</sub>e, 7.3 equiv PrOH, 150 °C, 260 rpm.

### 5.4. Propyl lactate (P<sub>1</sub>La; GP2\*)

The alcoholysis was analyzed using <sup>1</sup>H NMR spectroscopy as described in literature.<sup>[11]</sup> The <sup>1</sup>H NMR spectroscopic data is in good accordance with literature.<sup>[8, 11]</sup>

<sup>1</sup>H NMR (400 MHz, CDCl<sub>3</sub>) δ = 4.24 (q, *J* = 6.9 Hz, 1H, CH), 4.11 – 4.01 (m, 2H, OCH<sub>2</sub>), 1.68 – 1.57 (m, 2H, CH<sub>2</sub>CH<sub>2</sub>CH<sub>3</sub>), 1.34 (d, *J* = 6.9 Hz, 3H, CHCH<sub>3</sub>), 0.89 (t, *J* = 7.4 Hz, 3H, CH<sub>2</sub>CH<sub>3</sub>) ppm.

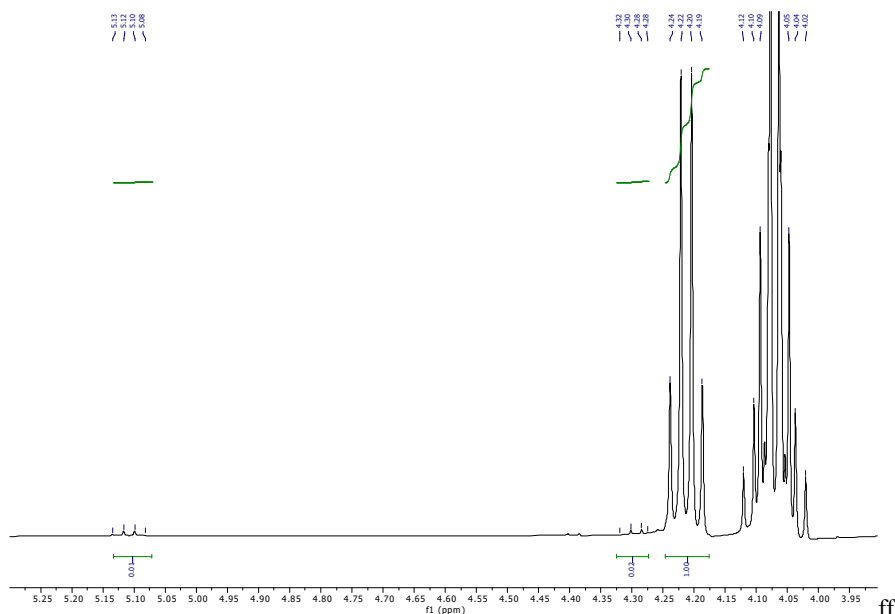

Figure S4. Exemplary  $^1\text{H}$  NMR spectrum in  $\text{CDCl}_3$  of the propaneolysis of PLA after 1 h. Reaction conditions (**GP2\***): 250 mg PLA, 1.0 mol% **Zn1**, 7.3 equiv  $\text{PrOH}$ ,  $150^\circ\text{C}$ , 260 rpm.

### 5.5. Butyl lactate (BuLa; GP1+GP2)

The alcoholysis was analyzed using  $^1\text{H}$  NMR spectroscopy as described in literature.<sup>[6-7, 12]</sup> The  $^1\text{H}$  NMR spectroscopic data is in good accordance with literature.<sup>[8, 12]</sup>

$^1\text{H}$  NMR (400 MHz,  $\text{CDCl}_3$ )  $\delta = 4.22$  (q,  $J = 6.9$  Hz, 1H, CH), 4.18 – 4.07 (m, 2H,  $\text{CH}_2\text{O}$ ), 1.63-1.56 (m, 2H,  $\text{CH}_2\text{CH}_2\text{CH}_2$ ), 0.89 (t,  $J = 7.4$  Hz, 3H,  $\text{CH}_2\text{CH}_3$ ) ppm.

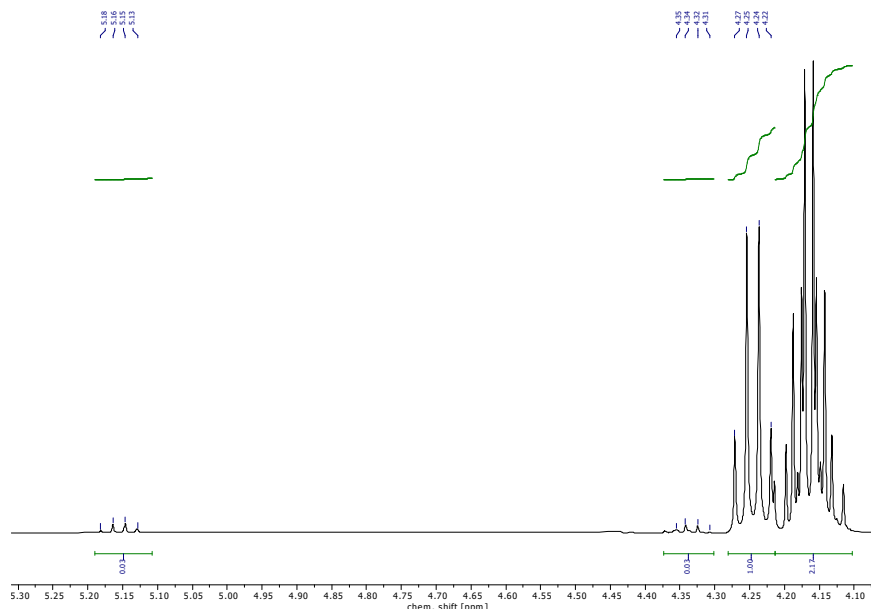

Figure S5. Exemplary  $^1\text{H}$  NMR spectrum in  $\text{CDCl}_3$  of the butanolysis of PLA after 180 min. Reaction conditions (**GP2**): 250 mg PLA, 1.0 mol%  $\text{TMG}_2\text{e}$ , 7.2 equiv  $\text{BuOH}$ ,  $150^\circ\text{C}$ , 260 rpm.

### 5.6. Pentyl lactate (PeLa; GP1+GP2)

The alcoholysis was analyzed using  $^1\text{H}$  NMR spectroscopy as described in literature.<sup>[6-7, 13]</sup> The  $^1\text{H}$  NMR spectroscopic data is in good accordance with literature.<sup>[8, 13]</sup>

$^1\text{H}$  NMR (400 MHz,  $\text{CDCl}_3$ )  $\delta = 4.19$  (q,  $J = 6.9$  Hz, 1H, CH), 4.14 – 4.03 (m, 2H,  $\text{CH}_2\text{O}$ ), 1.63 – 1.55 (m, 2H,  $\text{CH}_2\text{CH}_2\text{O}$ ), 1.34 (d,  $J = 6.9$  Hz, 3H,  $\text{CHCH}_3$ ) ppm.

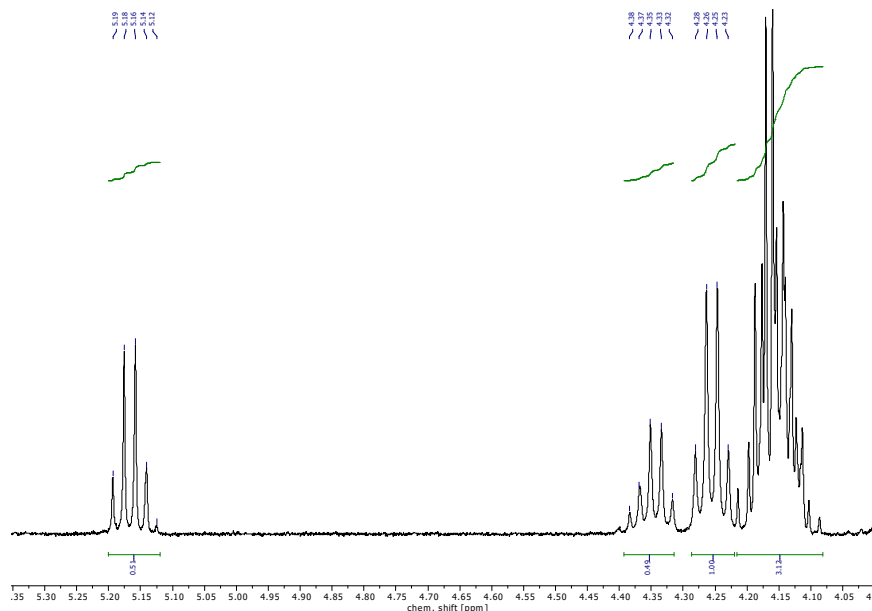

Figure S6. Exemplary  $^1\text{H}$  NMR spectrum in  $\text{CDCl}_3$  of the pentanolysis of PLA after 25 min. Reaction conditions (**GP2**): 250 mg PLA, 1.0 mol%  $\text{TMG}_2\text{e}$ , 7.2 equiv pentanol,  $150^\circ\text{C}$ , 260 rpm.

### 5.7. Hexyl lactate (HeLa; GP1+GP2)

The alcoholysis was analyzed using  $^1\text{H}$  NMR spectroscopy as described in literature.<sup>[6-7, 14-15]</sup> The  $^1\text{H}$  NMR spectroscopic data is in good accordance with literature.<sup>[8, 14-15]</sup>

$^1\text{H}$  NMR (400 MHz,  $\text{CDCl}_3$ )  $\delta$  = 4.23 (q,  $J$  = 6.9 Hz, 1H,  $\text{CHCH}_3$ ), 4.19 – 4.08 (m, 2H,  $\text{CH}_2\text{O}$ ), 1.66 – 1.58 (m, 1H,  $\text{CH}_2\text{CH}_2\text{O}$ ), 1.38 (d,  $J$  = 6.9 Hz, 3H,  $\text{CHCH}_3$ ) ppm.

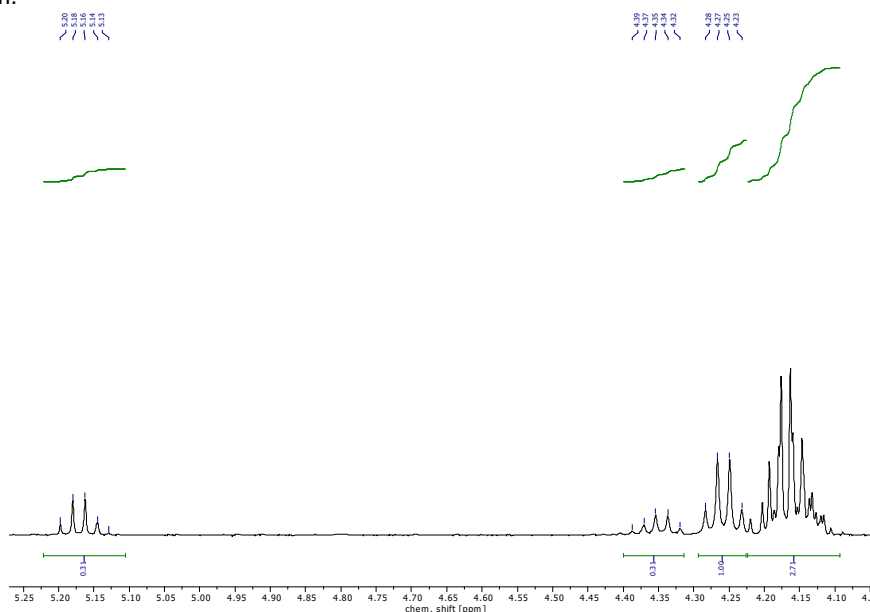

Figure S7. Exemplary  $^1\text{H}$  NMR spectrum in  $\text{CDCl}_3$  of the hexanolysis of PLA after 25 min. Reaction conditions (GP2): 250 mg PLA, 1.0 mol%  $\text{TMG}_2\text{e}$ , 7.1 equiv hexanol, 150  $^\circ\text{C}$ , 260 rpm.

### 5.8. Octyl lactate (OcLa; GP1+GP2)

The alcoholysis was analyzed using  $^1\text{H}$  NMR spectroscopy as described in literature.<sup>[6-7, 13, 15]</sup> The  $^1\text{H}$  NMR spectroscopic data is in good accordance with literature.<sup>[8, 13, 15]</sup> We could not identify all signals due to overlapping OcOH signals.

$^1\text{H}$  NMR (400 MHz,  $\text{CDCl}_3$ )  $\delta$  = 4.23 (q,  $J$  = 6.9 Hz, 1H,  $\text{CHCH}_3$ ), 4.19 – 4.08 (m, 2H,  $\text{CH}_2\text{O}$ ), 1.67 – 1.58 (m, 1H,  $\text{CH}_2\text{CH}_2\text{O}$ ), 1.38 (d,  $J$  = 6.9 Hz, 3H,  $\text{CHCH}_3$ ) ppm.

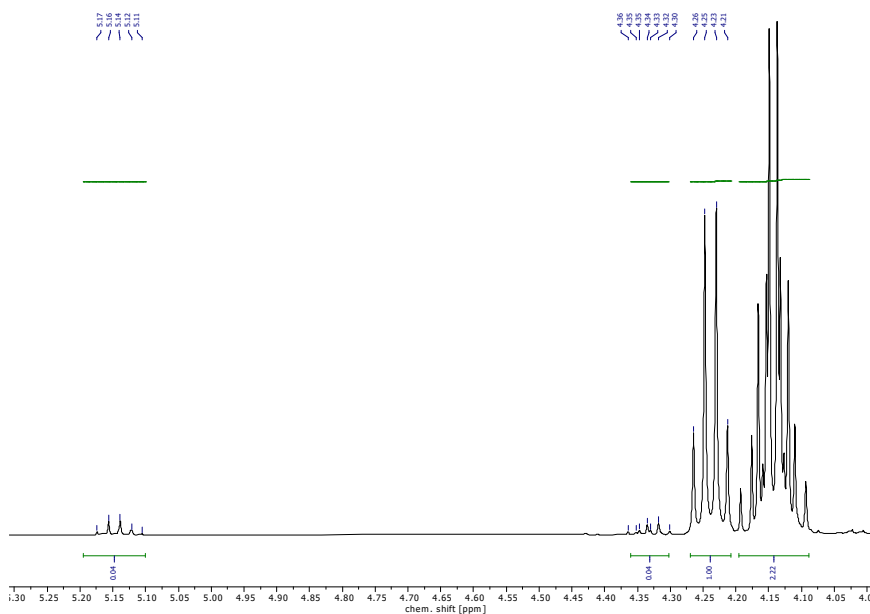

Figure S8. Exemplary  $^1\text{H}$  NMR spectrum in  $\text{CDCl}_3$  of the octanolysis of PLA after 48 h. Reaction conditions (GP2): 250 mg PLA, 1.0 mol%  $\text{TMG}_2\text{e}$ , 7.1 equiv octanol, 150  $^\circ\text{C}$ , 260 rpm.

### 5.9. Octyl lactate (OcLa; GP2\*)

The alcoholysis was analyzed using  $^1\text{H}$  NMR spectroscopy as described in literature.<sup>[6-7, 13, 15]</sup> The  $^1\text{H}$  NMR spectroscopic data is in good accordance with literature.<sup>[8, 13, 15]</sup> We could not identify all signals due to overlapping OcOH signals.

$^1\text{H}$  NMR (400 MHz,  $\text{CDCl}_3$ )  $\delta$  = 4.20 (q,  $J$  = 6.9 Hz, 1H,  $\text{CHCH}_3$ ), 4.15 – 4.04 (m, 2H,  $\text{CH}_2\text{O}$ ), 1.60 (p,  $J$  = 6.7 Hz, 1H,  $\text{CH}_2\text{CH}_2\text{O}$ ), 1.35 (d,  $J$  = 6.8 Hz, 3H,  $\text{CHCH}_3$ ) ppm.

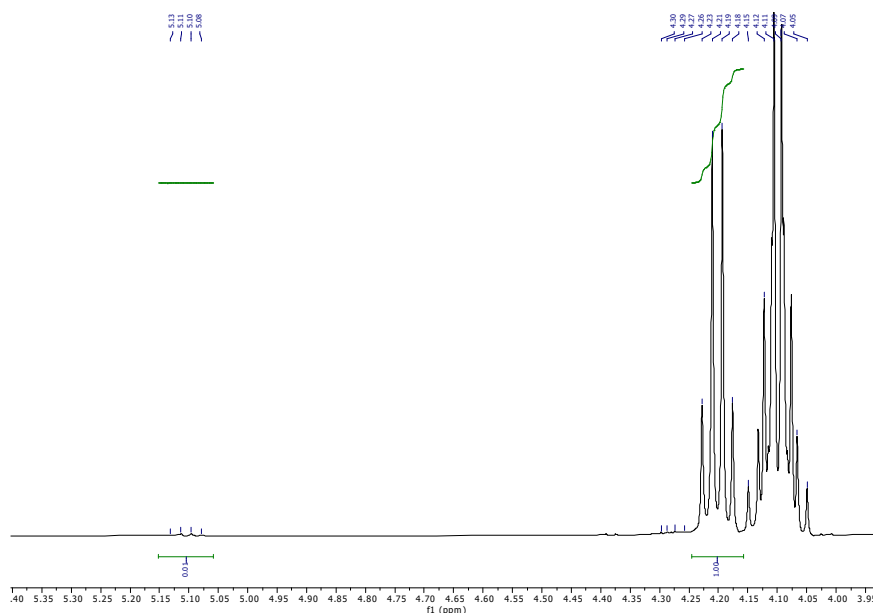

Figure S9. Exemplary  $^1\text{H}$  NMR spectrum in  $\text{CDCl}_3$  of the octanololysis of PLA after 1 h. Reaction conditions (**GP2\***): 250 mg PLA, 1.0 mol% **Zn1**, 7.1 equiv octanol, 150 °C, 260 rpm.

### 5.10. *iso*-Propyl lactate (*i*PrLa; GP2)

The alcoholysis was analyzed using  $^1\text{H}$  NMR spectroscopy as described in literature.<sup>[11, 16]</sup> The  $^1\text{H}$  NMR spectroscopic data is in good accordance with literature.<sup>[8]</sup> Due to the overlap of the internal methine of PLA with the methine functionality of the *iso*-propyl residue of the product a quantitative analysis was aggravated. Moreover, unidentified depolymerization products are still observable after 48 h.

$^1\text{H}$  NMR (400 MHz,  $\text{CDCl}_3$ )  $\delta$  = 5.08 – 4.93 ( $\text{CH}(\text{CH}_3)_2$  + oligomer), 4.34 – 4.25 (oligomer), 4.15 (q,  $J$  = 6.9 Hz, 1H,  $\text{CHCH}_3$ ), 1.33 (d,  $J$  = 6.9 Hz, 3H,  $\text{CHCH}_3$ ), 1.22 – 1.19 (m, 6H,  $\text{CH}(\text{CH}_3)_2$ ).

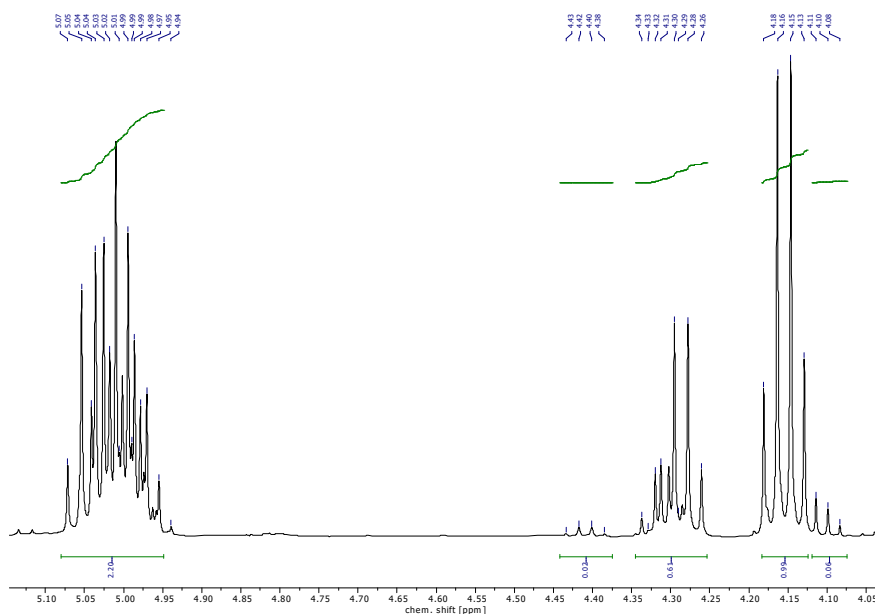

Figure S10. Exemplary  $^1\text{H}$  NMR spectrum in  $\text{CDCl}_3$  of the alcoholysis of PLA using *iso*-propanol after 1 h. Reaction conditions (**GP2**): 250 mg PLA, 1.0 mol% **TMG2e**, 7.2 equiv *i*PrOH, 150 °C, 260 rpm.

### 5.11. *iso*-Propyl lactate (*i*PrLa; GP2\*)

The alcoholysis was analyzed using  $^1\text{H}$  NMR spectroscopy as described in literature.<sup>[11, 16]</sup> The  $^1\text{H}$  NMR spectroscopic data is in good accordance with literature.<sup>[8]</sup>

$^1\text{H}$  NMR (400 MHz,  $\text{CDCl}_3$ )  $\delta$  = 5.03 (hept,  $J$  = 6.2 Hz, 1H,  $\text{CH}(\text{CH}_3)_2$ ), 4.17 (q,  $J$  = 6.9 Hz, 1H,  $\text{CHCH}_3$ ), 1.35 (d,  $J$  = 6.9 Hz, 3H,  $\text{CHCH}_3$ ), 1.22 (dd,  $J$  = 6.3, 2.6 Hz, 6H,  $\text{CH}(\text{CH}_3)_2$ ).

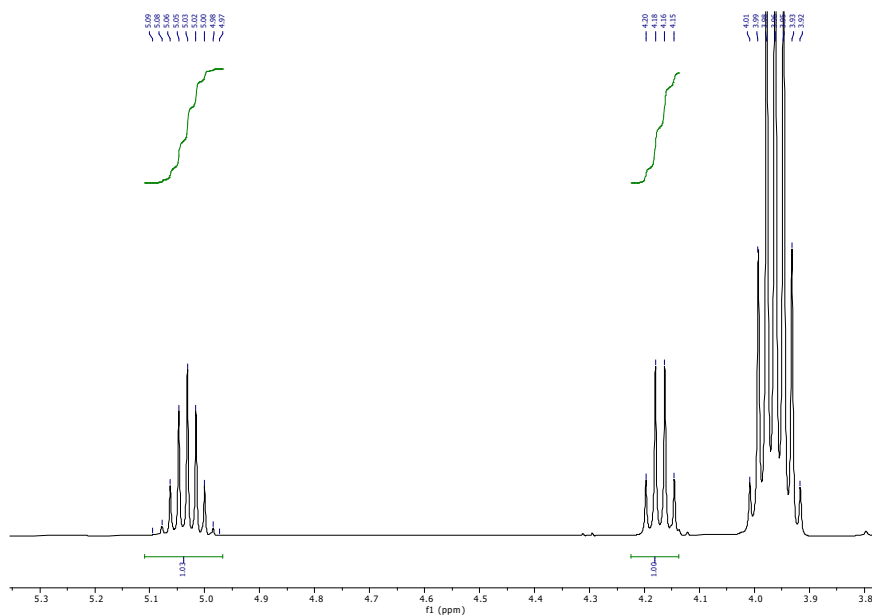

Figure S11. Exemplary  $^1\text{H}$  NMR spectrum in  $\text{CDCl}_3$  of the alcoholysis of PLA using *iso*-propanol after 2 h. Reaction conditions (GP2\*): 250 mg PLA, 1.0 mol% Zn1, 7.2 equiv *i*PrOH, 150 °C, 260 rpm.

### 5.12. *iso*-Butyl lactate (*i*BuLa; GP1+GP2)

The alcoholysis was analyzed using  $^1\text{H}$  NMR spectroscopy as described in literature.<sup>[11-12]</sup> The  $^1\text{H}$  NMR spectroscopic data is in good accordance with literature.<sup>[8, 12]</sup>

$^1\text{H}$  NMR (400 MHz,  $\text{CDCl}_3$ )  $\delta$  = 4.26 (q,  $J$  = 6.9 Hz, 1H,  $\text{CHCH}_3$ ), 4.00 – 3.88 (m, 2H,  $\text{CH}_2\text{O}$ ), 1.40 (d,  $J$  = 6.9 Hz, 3H,  $\text{CHCH}_3$ ), 0.93, 0.91 (d,  $J$  = 6.8, 3H,  $\text{CH}(\text{CH}_3)_2$ ) ppm.

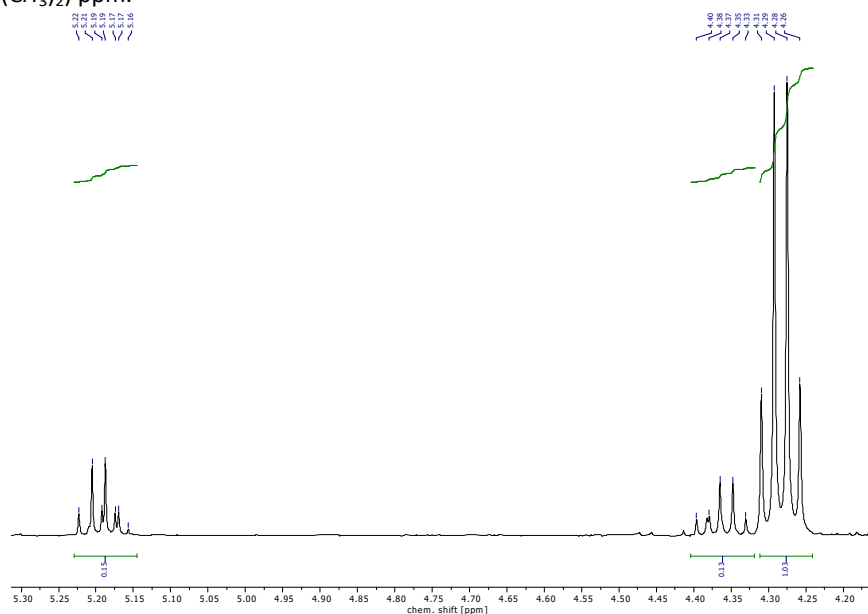

### 5.13. 3,3-Dimethylbutyl lactate (Me<sub>2</sub>BuLa; GP1+GP2)

The alcoholysis was analyzed according to literature.<sup>[6-8, 10]</sup>

<sup>1</sup>H NMR (400 MHz, CDCl<sub>3</sub>) δ = 4.25 – 4.13 (m, 3H, CHCH<sub>3</sub>+CH<sub>2</sub>O), 1.55 (dd, *J* = 8.3, 6.6 Hz, 2H, CH<sub>2</sub>O), 1.37 (d, *J* = 6.9 Hz, 3H, CHCH<sub>3</sub>), 0.91 (d, *J* = 2.6 Hz, 9H, CH<sub>2</sub>(CH<sub>3</sub>)<sub>3</sub>) ppm.

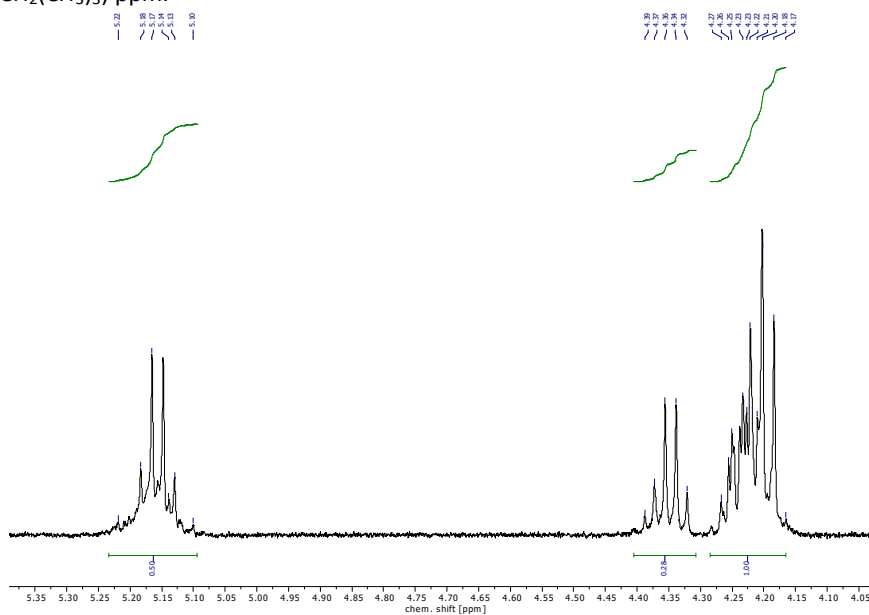

Figure S13. Exemplary <sup>1</sup>H NMR spectrum of the alcoholysis in CDCl<sub>3</sub> of PLA using 3,3-dimethylbutan-1-ol after 5 min. Reaction conditions (GP2): 250 mg PLA, 1.0 mol% TMG<sub>2</sub>e, 7.1 equiv 3,3-dimethylbutan-1-ol, 150 °C, 260 rpm.

### 5.14. *tert*-Butyl lactate (tBuLa; GP2)

The alcoholysis was analyzed using <sup>1</sup>H NMR spectroscopy as described in literature. No depolymerization was observed conducting GP1. Following GP2, slow conversion of PLA was observed to various depolymerization species. The product mixture was not analyzed further.

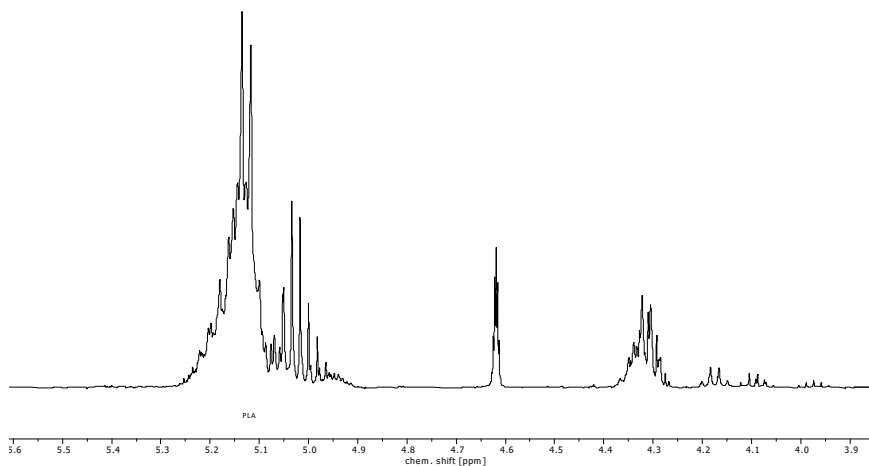

Figure S14. Exemplary <sup>1</sup>H NMR spectrum in CDCl<sub>3</sub> of the *tert*-butanolysis of PLA after 72 h. Reaction conditions (GP2): 250 mg PLA, 1.0 mol% TMG<sub>2</sub>e, 7.0 equiv tBuOH, 4 mL THF, 60 °C, 260 rpm.

### 5.15. Pentan-3-yl 2-hydroxypropanoate (3PeLa; GP1+GP2)

The alcoholysis was analyzed using  $^1\text{H}$  NMR spectroscopy as described in literature.<sup>[17]</sup> No depolymerization was observed conducting GP1. Following GP2, slow conversion of PLA was observed. The product mixture was not analyzed further.

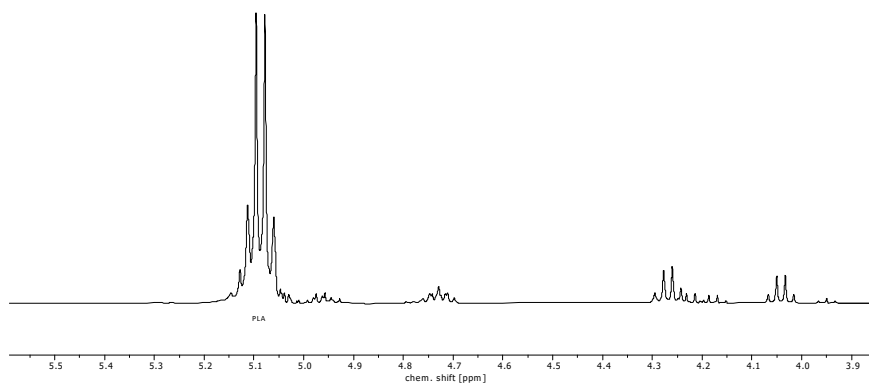

Figure S15. Exemplary  $^1\text{H}$  NMR spectrum in  $\text{CDCl}_3$  of the alcoholysis of PLA using 3-pentanol after 3 h. Reaction conditions (GP2): 250 mg PLA, 1.0 mol%  $\text{TMG}_2\text{e}$ , 7.2 equiv 3-PeOH, 4 mL THF, 60 °C, 260 rpm.

### 5.16. Allyl lactate (ALLa; GP1+GP2)

The alcoholysis was analyzed using  $^1\text{H}$  NMR spectroscopy as described in literature.<sup>[10-11, 18]</sup> The  $^1\text{H}$  NMR spectroscopic data is in good accordance with literature.<sup>[8, 11]</sup> Due to the overlap of the methine signal of PLA with a signal of the allyl alcohol used a quantitative evaluation was aggravated. We propose fast depolymerization of PLA due to the good fit of the integration of the visible signals of ALLa. Furthermore, we could not identify a signal of the methyl group of PLA.

$^1\text{H}$  NMR (400 MHz,  $\text{CDCl}_3$ )  $\delta$  = 5.90 (ddt,  $J$  = 17.3, 10.4, 5.8 Hz, 1H,  $\text{CH}_2=\text{CH}$ ), 5.32 (dq,  $J$  = 17.3, 1.4 Hz, 1H,  $\text{CH}=\text{CH}$ ), 4.70 – 4.59 (m, 2H,  $\text{CH}_2\text{O}$ ), 4.28 (q,  $J$  = 6.9 Hz, 1H, CH), 1.41 (d,  $J$  = 6.9 Hz, 3H,  $\text{CHCH}_3$ ) ppm.

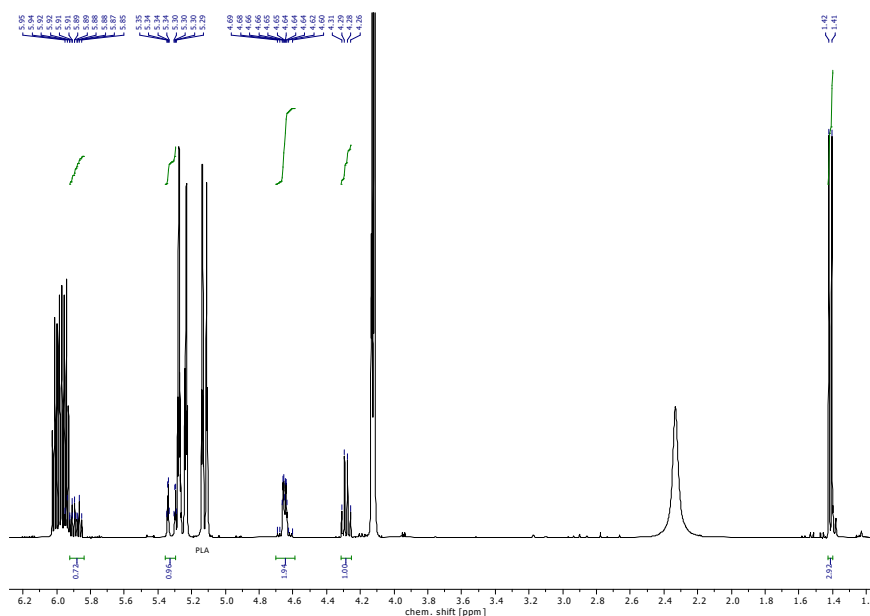

Figure S16. Exemplary  $^1\text{H}$  NMR spectrum in  $\text{CDCl}_3$  of the alcoholysis of PLA using allyl alcohol after 24 h. Reaction conditions (GP2): 250 mg PLA, 1.0 mol%  $\text{TMG}_2\text{e}$ , 7.2 equiv AllylOH, 150 °C, 260 rpm.

### 5.17. Benzyl lactate (BnLa; GP1+GP2)

The alcoholysis was analyzed using  $^1\text{H}$  NMR spectroscopy as described in literature.<sup>[18-20]</sup> The  $^1\text{H}$  NMR spectroscopic data is in good accordance with literature.<sup>[18-20]</sup> No oligomer formation is observed under the given reaction conditions. Furthermore, the signal for the internal methine group of the PLA is overlapped by the signal for the  $\text{OCH}_2$  group of the BnLa.

$^1\text{H}$  NMR (400 MHz,  $\text{CDCl}_3$ )  $\delta$  = 5.11 (s, 2H,  $\text{CH}_2\text{O}$ ), 4.21 (q,  $J$  = 6.9 Hz, 1H,  $\text{CHCH}_3$ ), 1.33 (d,  $J$  = 6.9 Hz, 3H,  $\text{CHCH}_3$ ) ppm.

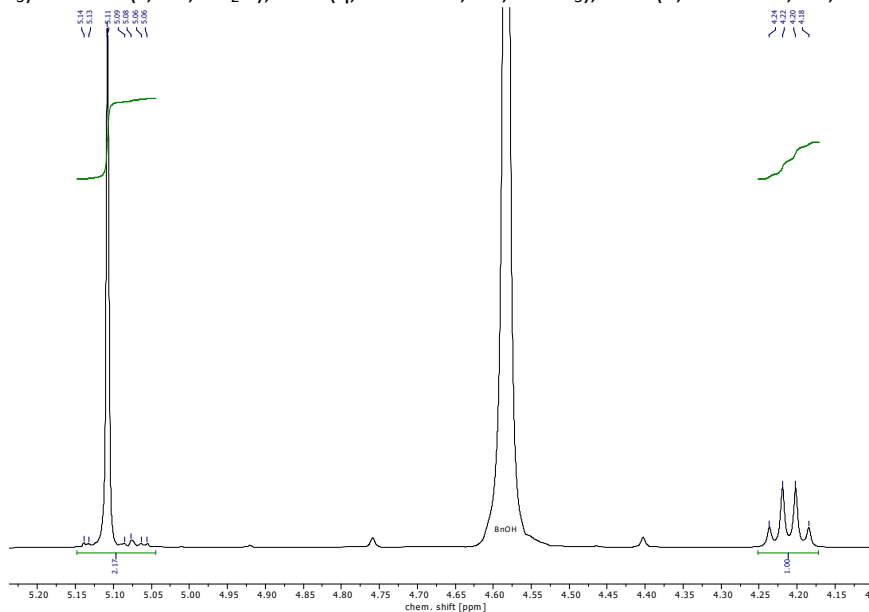

Figure S17. Exemplary  $^1\text{H}$  NMR spectrum in  $\text{CDCl}_3$  of the alcoholysis of PLA using benzyl alcohol after 25 min. Reaction conditions (**GP2**): 250 mg PLA, 1.0 mol%  $\text{TMG}_2\text{e}$ , 7.2 equiv BnOH, 150  $^\circ\text{C}$ , 260 rpm.

### 5.18. 2-Hydroxyethyl 2-hydroxypropanoate (EGLa; GP2)

The glycolysis was analyzed using  $^1\text{H}$  NMR spectroscopy as described in literature.<sup>[10-11, 21]</sup> The  $^1\text{H}$  NMR spectroscopic data is in good accordance with literature.<sup>[10-11, 21]</sup> Due to the overlap of the methine signal of PLA with a signal of the ethylene glycol used a quantitative evaluation was aggravated. We propose fast depolymerization of PLA due to the good fit of the integration of the visible signals of EGLa. Furthermore, we could not identify the signal of the methyl group of PLA.

$^1\text{H}$  NMR (400 MHz,  $\text{CDCl}_3$ )  $\delta$  = 4.37 – 4.13 (m, 3H,  $\text{CH}+\text{OCH}_2$ ), 3.77 (t,  $J$  = 4.6 Hz, 2H,  $\text{CH}_2\text{OH}$ ), 1.38 (d,  $J$  = 6.9 Hz, 3H,  $\text{CHCH}_3$ ) ppm.

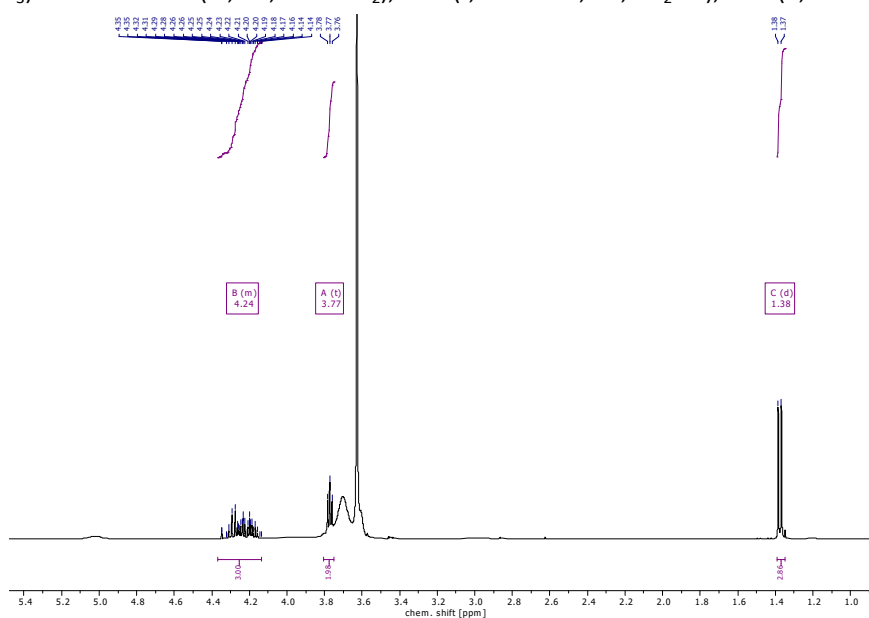

Figure S18. Exemplary  $^1\text{H}$  NMR spectrum in  $\text{CDCl}_3$  of the glycolysis of PLA after 180 min. Reaction conditions (**GP2**): 250 mg PLA, 1.0 mol%  $\text{TMG}_2\text{e}$ , 7.2 equiv EG, 150  $^\circ\text{C}$ , 260 rpm.

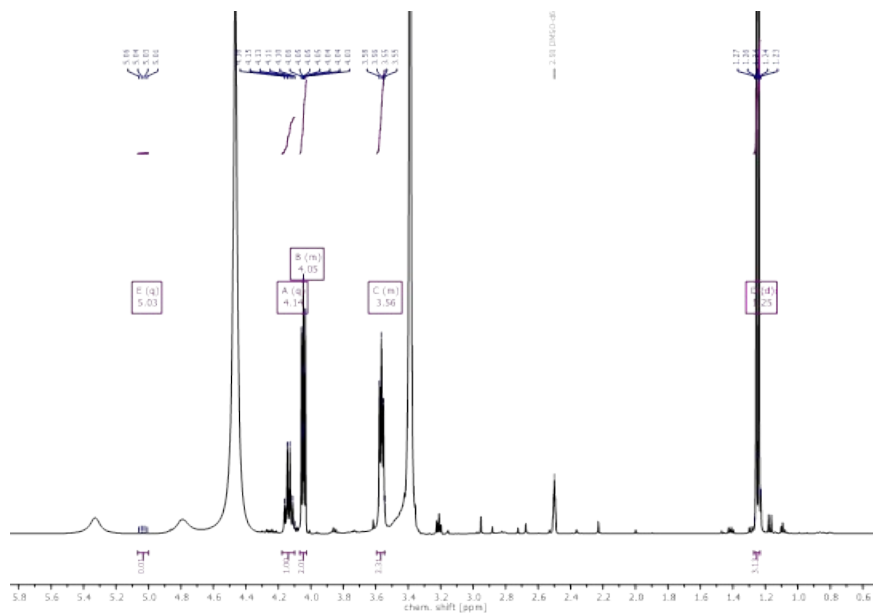

Figure S19. Exemplary  $^1\text{H}$  NMR spectrum in  $\text{DMSO-}d_6$  of the glycolysis of PLA after 2880 min. Reaction conditions (GP2): 250 mg PLA, 1.0 mol%  $\text{TMG}_2\text{e}$ , 7.2 equiv EG,  $150^\circ\text{C}$ , 260 rpm.

## 6. Results for the depolymerization of PLA

### 6.1. Depolymerization using TMG<sub>2</sub>e following GP1

Table S2 Overview over depolymerization of PLA using TMG<sub>2</sub>e and different nucleophiles following GP1.

| Entry           | Nu                   | #C | $n_{\text{PLA}}$ [mmol] | $n_{\text{cat}}$ [ $\mu\text{mol}$ ] | $V_{\text{Nu}}$ [mL] | $t$ [h] | $X_{\text{int}}^a$ [%]                        | $S_{\text{RLa}}^a$ [%] | $Y_{\text{RLa}}^a$ [%] |
|-----------------|----------------------|----|-------------------------|--------------------------------------|----------------------|---------|-----------------------------------------------|------------------------|------------------------|
| 1 <sup>b</sup>  | EtOH                 | 2  | 3.47                    | 34.7                                 | 1.44                 | 1       | 89                                            | 21                     | 18                     |
|                 |                      |    |                         |                                      |                      | 3       | 94                                            | 57                     | 54                     |
|                 |                      |    |                         |                                      |                      | 19.5    | 100                                           | 100                    | 100                    |
| 2               | EtOH                 | 2  | 3.47                    | 34.7                                 | 1.44                 | 0.5     | 60                                            | 13                     | 8                      |
|                 |                      |    |                         |                                      |                      | 1       | 96                                            | 28                     | 27                     |
|                 |                      |    |                         |                                      |                      | 3       | 98                                            | 67                     | 66                     |
|                 |                      |    |                         |                                      |                      | 6       | 100                                           | 84                     | 84                     |
|                 |                      |    |                         |                                      |                      | 48      | 100                                           | 100                    | 100                    |
| 3               | PrOH                 | 3  | 3.47                    | 34.7                                 | 1.9                  | 24      | 100                                           | 93                     | 93                     |
| 4               | PrOH                 | 3  | 3.47                    | 34.7                                 | 1.9                  | 24      | 100                                           | 96                     | 96                     |
|                 |                      |    |                         |                                      |                      | 48      | 100                                           | 98                     | 98                     |
|                 |                      |    |                         |                                      |                      | 48      | 100                                           | 98                     | 98                     |
| 5               | AlOH                 | 3  | 3.47                    | 34.7                                 | 1.7                  | 0.5     | 100                                           | 100                    | 100                    |
| 6               | BuOH                 | 4  | 3.47                    | 34.7                                 | 2.3                  | 1       | 25                                            | 3                      | 1                      |
|                 |                      |    |                         |                                      |                      | 3       | 80                                            | 15                     | 12                     |
|                 |                      |    |                         |                                      |                      | 24      | 100                                           | 71                     | 70                     |
|                 |                      |    |                         |                                      |                      | 48      | 100                                           | 85                     | 85                     |
| 7               | <i>i</i> BuOH        | 4  | 3.47                    | 34.7                                 | 2.3                  | 1       | 21                                            | 0                      | 0                      |
|                 |                      |    |                         |                                      |                      | 3       | 86                                            | 20                     | 15                     |
|                 |                      |    |                         |                                      |                      | 24      | 100                                           | 72                     | 72                     |
|                 |                      |    |                         |                                      |                      | 48      | 100                                           | 88                     | 88                     |
| 8               | <i>t</i> BuOH        | 4  | 3.47                    | 34.7                                 | 1.3                  | 24      | small amount of oligomer formation observable |                        |                        |
| 9               | PeOH                 | 5  | 3.47                    | 34.7                                 | 2.7                  | 24      | 98                                            | 78                     | 77                     |
| 10              | PeOH                 | 5  | 3.47                    | 34.7                                 | 2.7                  | 24      | 100                                           | 79                     | 79                     |
|                 |                      |    |                         |                                      |                      | 48      | 100                                           | 91                     | 91                     |
|                 |                      |    |                         |                                      |                      | 120     | 100                                           | 98                     | 98                     |
| 11              | PeOH                 | 5  | 3.47                    | 34.7                                 | 2.7                  | 24      | 100                                           | 81                     | 81                     |
|                 |                      |    |                         |                                      |                      | 48      | 100                                           | 91                     | 91                     |
| 12              | 3PeOH                | 5  | 3.47                    | 34.7                                 | 2.7                  | 24      | 0                                             | 0                      | 0                      |
| 13              | 3PeOH                | 5  | 3.47                    | 34.7                                 | 2.7                  | 48      | 0                                             | 0                      | 0                      |
|                 |                      |    |                         |                                      |                      | 24      | 0                                             | 0                      | 0                      |
| 14              | HeOH                 | 6  | 3.47                    | 34.7                                 | 3.1                  | 24      | 93                                            | 76                     | 70                     |
| 15 <sup>b</sup> | HeOH                 | 6  | 3.47                    | 34.7                                 | 3.1                  | 24      | 88                                            | 83                     | 74                     |
|                 |                      |    |                         |                                      |                      | 48      | 91                                            | 93                     | 84                     |
| 16              | HeOH                 | 6  | 3.47                    | 34.7                                 | 3.1                  | 24      | 98                                            | 86                     | 85                     |
|                 |                      |    |                         |                                      |                      | 48      | 100                                           | 94                     | 94                     |
|                 |                      |    |                         |                                      |                      | 48      | 100                                           | 94                     | 94                     |
| 17              | Me <sub>2</sub> BuOH | 6  | 3.47                    | 34.7                                 | 1.5                  | 48      | 100                                           | 75                     | 75                     |
| 18              | Me <sub>2</sub> BuOH | 6  | 3.47                    | 34.7                                 | 1.5                  | 24      | 97                                            | 35                     | 34                     |
|                 |                      |    |                         |                                      |                      | 48      | 100                                           | 46                     | 46                     |
| 19 <sup>b</sup> | OcOH                 | 8  | 3.47                    | 34.7                                 | 3.8                  | 24      | 57                                            | 75                     | 43                     |
|                 |                      |    |                         |                                      |                      | 48      | 78                                            | 81                     | 63                     |
| 20              | OcOH                 | 8  | 3.47                    | 34.7                                 | 3.8                  | 24      | 71                                            | 75                     | 53                     |
|                 |                      |    |                         |                                      |                      | 48      | 91                                            | 83                     | 76                     |

**a**  $X_{\text{int}}$ ,  $S_{\text{RLa}}$ ,  $Y_{\text{RLa}}$  were calculated from <sup>1</sup>H NMR spectroscopic analysis according to literature<sup>[6, 10]</sup> or as described in chapter 3.2. **b** Variations of the results of repeated experiments can be explained by the influence of impurities in the used chemicals as well as the less-controlled conditions during the experiments and the uncertainties of the <sup>1</sup>H NMR spectroscopic analysis.

## 6.2. Depolymerization using TMG<sub>2</sub>e following GP2

Table S3 Overview over depolymerization of PLA using TMG<sub>2</sub>e and different nucleophiles following GP2.

| Entry | Nu                   | #C | $n_{\text{PLA}}$ [mmol] | $n_{\text{cat}}$ [ $\mu\text{mol}$ ] | $V_{\text{Nu}}$ [mL] | $t$ [h] | $X_{\text{int}}^a$ [%]                    | $S_{\text{RLA}}^a$ [%] | $Y_{\text{RLA}}^a$ [%] |
|-------|----------------------|----|-------------------------|--------------------------------------|----------------------|---------|-------------------------------------------|------------------------|------------------------|
| 1     | MeOH                 | 1  | 3.47                    | 34.7                                 | 1.0                  | 0.08    | 100                                       | 98                     | 98                     |
| 2     | EtOH                 | 2  | 3.47                    | 34.7                                 | 1.4                  | 0.08    | 89                                        | 75                     | 67                     |
|       |                      |    |                         |                                      |                      | 0.17    | 100                                       | 75                     | 75                     |
|       |                      |    |                         |                                      |                      | 0.25    | 100                                       | 79                     | 79                     |
|       |                      |    |                         |                                      |                      | 1       | 100                                       | 89                     | 89                     |
|       |                      |    |                         |                                      |                      | 3       | 100                                       | 94                     | 94                     |
| 3     | EG                   | 2  | 3.47                    | 34.7                                 | 1.4                  | 1       | –                                         | –                      | –                      |
|       |                      |    |                         |                                      |                      | 48      | 100                                       | –                      | 100                    |
|       |                      |    |                         |                                      |                      |         |                                           |                        |                        |
| 4     | PrOH                 | 3  | 3.47                    | 34.7                                 | 1.8                  | 0.42    | 89                                        | 42                     | 37                     |
|       |                      |    |                         |                                      |                      | 1       | 99                                        | 49                     | 48                     |
|       |                      |    |                         |                                      |                      | 3       | 100                                       | 69                     | 69                     |
|       |                      |    |                         |                                      |                      | 24      | 100                                       | 96                     | 96                     |
|       |                      |    |                         |                                      |                      | 48      | 100                                       | 98                     | 98                     |
| 5     | <i>i</i> PrOH        | 3  | 3.47                    | 34.7                                 | 1.9                  | 1       | 64                                        | 19                     | 12                     |
|       |                      |    |                         |                                      |                      | 24      | 100                                       | 36                     | 36                     |
|       |                      |    |                         |                                      |                      | 48      | 100                                       | 45                     | 45                     |
| 6     | AlOH                 | 3  | 3.47                    | 34.7                                 | 1.7                  | 0.42    | 100                                       | 100                    | 100                    |
| 7     | BuOH                 | 4  | 3.47                    | 34.7                                 | 2.2                  | 0.58    | 98                                        | 83                     | 82                     |
|       |                      |    |                         |                                      |                      | 3       | 100                                       | 94                     | 94                     |
|       |                      |    |                         |                                      |                      | 24      | 100                                       | 98                     | 98                     |
| 8     | <i>i</i> BuOH        | 4  | 3.47                    | 34.7                                 | 2.3                  | 0.17    | 82                                        | 27                     | 22                     |
|       |                      |    |                         |                                      |                      | 1       | 82                                        | 26                     | 21                     |
|       |                      |    |                         |                                      |                      | 3       | 98                                        | 79                     | 78                     |
|       |                      |    |                         |                                      |                      | 48      | 100                                       | 96                     | 96                     |
| 9     | <i>t</i> BuOH        | 4  | 3.47                    | 34.7                                 | 2.3                  | 2       | PLA is slowly depolymerized.              |                        |                        |
| 10    | <i>t</i> BuOH        | 4  | 3.47                    | 34.7                                 | 2.3                  | 72      | We did not identify the formed oligomeric |                        |                        |
| 11    | <i>t</i> BuOH        | 4  | 3.47                    | 34.7                                 | 2.3                  | 72      | species.                                  |                        |                        |
| 12    | PeOH                 | 5  | 3.47                    | 34.7                                 | 2.7                  | 0.42    | 99                                        | 51                     | 50                     |
|       |                      |    |                         |                                      |                      | 1       | 100                                       | 65                     | 65                     |
|       |                      |    |                         |                                      |                      | 3       | 100                                       | 77                     | 77                     |
|       |                      |    |                         |                                      |                      | 24      | 100                                       | 96                     | 96                     |
|       |                      |    |                         |                                      |                      | 48      | 100                                       | 98                     | 98                     |
| 13    | 3PeOH                | 5  | 3.47                    | 34.7                                 | 2.7                  | 48      | PLA is slowly depolymerized               |                        |                        |
| 14    | HeOH                 | 6  | 3.47                    | 34.7                                 | 3.1                  | 0.42    | 100                                       | 62                     | 62                     |
|       |                      |    |                         |                                      |                      | 1       | 100                                       | 77                     | 77                     |
|       |                      |    |                         |                                      |                      | 3       | 100                                       | 91                     | 91                     |
|       |                      |    |                         |                                      |                      | 24      | 100                                       | 98                     | 98                     |
| 15    | Me <sub>2</sub> BuOH | 6  | 3.47                    | 34.7                                 | 3.1                  | 1       | 75                                        | 22                     | 17                     |
|       |                      |    |                         |                                      |                      | 3       | 100                                       | 33                     | 33                     |
|       |                      |    |                         |                                      |                      | 24      | 100                                       | 64                     | 64                     |
|       |                      |    |                         |                                      |                      | 48      | 100                                       | 71                     | 71                     |
| 16    | BnOH                 | 7  | 3.47                    | 34.7                                 | 2.6                  | 0.42    | 85                                        | 100                    | 85                     |
|       |                      |    |                         |                                      |                      | 1       | 89                                        | 100                    | 89                     |
|       |                      |    |                         |                                      |                      | 24      | 99                                        | 100                    | 99                     |
| 17    | OcOH                 | 8  | 3.47                    | 34.7                                 | 3.9                  | 0.42    | 100                                       | 44                     | 44                     |
|       |                      |    |                         |                                      |                      | 3       | 98                                        | 85                     | 83                     |
|       |                      |    |                         |                                      |                      | 24      | 100                                       | 91                     | 91                     |
|       |                      |    |                         |                                      |                      | 48      | 100                                       | 93                     | 93                     |

<sup>a</sup>  $X_{\text{int}}$ ,  $S_{\text{RLA}}$ ,  $Y_{\text{RLA}}$  were calculated from <sup>1</sup>H NMR spectroscopic analysis according to literature<sup>[6, 10]</sup> or as described in chapter 3.2.

### 6.3. Depolymerization using Zn1 following GP2\*

Table S4 Overview over depolymerization of PLA using Zn1 and different nucleophiles following GP2\*.

| Entry | Nu            | #C | $n_{\text{PLA}}$ [mmol] | $n_{\text{cat}}$ [ $\mu\text{mol}$ ] | $V_{\text{Nu}}$ [mL] | $t$ [h] | $X_{\text{int}}^a$ [%] | $S_{\text{RLa}}^a$ [%] | $Y_{\text{MRLa}}^a$ [%] |
|-------|---------------|----|-------------------------|--------------------------------------|----------------------|---------|------------------------|------------------------|-------------------------|
| 1     | PrOH          | 3  | 3.47                    | 34.7                                 | 1.0                  | 1       | 100                    | 98                     | 98                      |
| 2     | <i>i</i> PrOH | 3  | 3.47                    | 34.7                                 | 1.4                  | 1       | 98                     | 98                     | 98                      |
|       |               |    |                         |                                      |                      | 2       | 99                     | 98                     | 97                      |
| 3     | OcOH          | 8  | 3.47                    | 34.7                                 | 3.9                  | 1       | 100                    | 98                     | 98                      |

<sup>a</sup>  $X_{\text{int}}$ ,  $S_{\text{RLa}}$ ,  $Y_{\text{MRLa}}$  were calculated from <sup>1</sup>H NMR spectroscopic analysis according to literature<sup>[6, 10]</sup> or as described in chapter 3.2.

## 7. New data used in the RNFA analysis

For the pathway screening performed in this work, yield data listed in Table S5 were used in addition to data introduced in previous publications (see manuscript).

Table S5 Reaction selectivity of the reaction steps introduced in this work

| Educts                    | Products               | Yield | Reference |
|---------------------------|------------------------|-------|-----------|
| Glycerol                  | Allyl alcohol          | 98%   | 26        |
| 1,2-propandiol            | Allyl alcohol          | 47%   | 27        |
| propylene oxide           | Allyl alcohol          | 88.9% | 28        |
| propylene, H <sub>2</sub> | propylene oxide, water | 98%   | 29        |
| Waste_oil, methanol       | Glycerol, FAME         | 95%   | 30        |

## 8. Production pathways present in the results shown in Figure 5

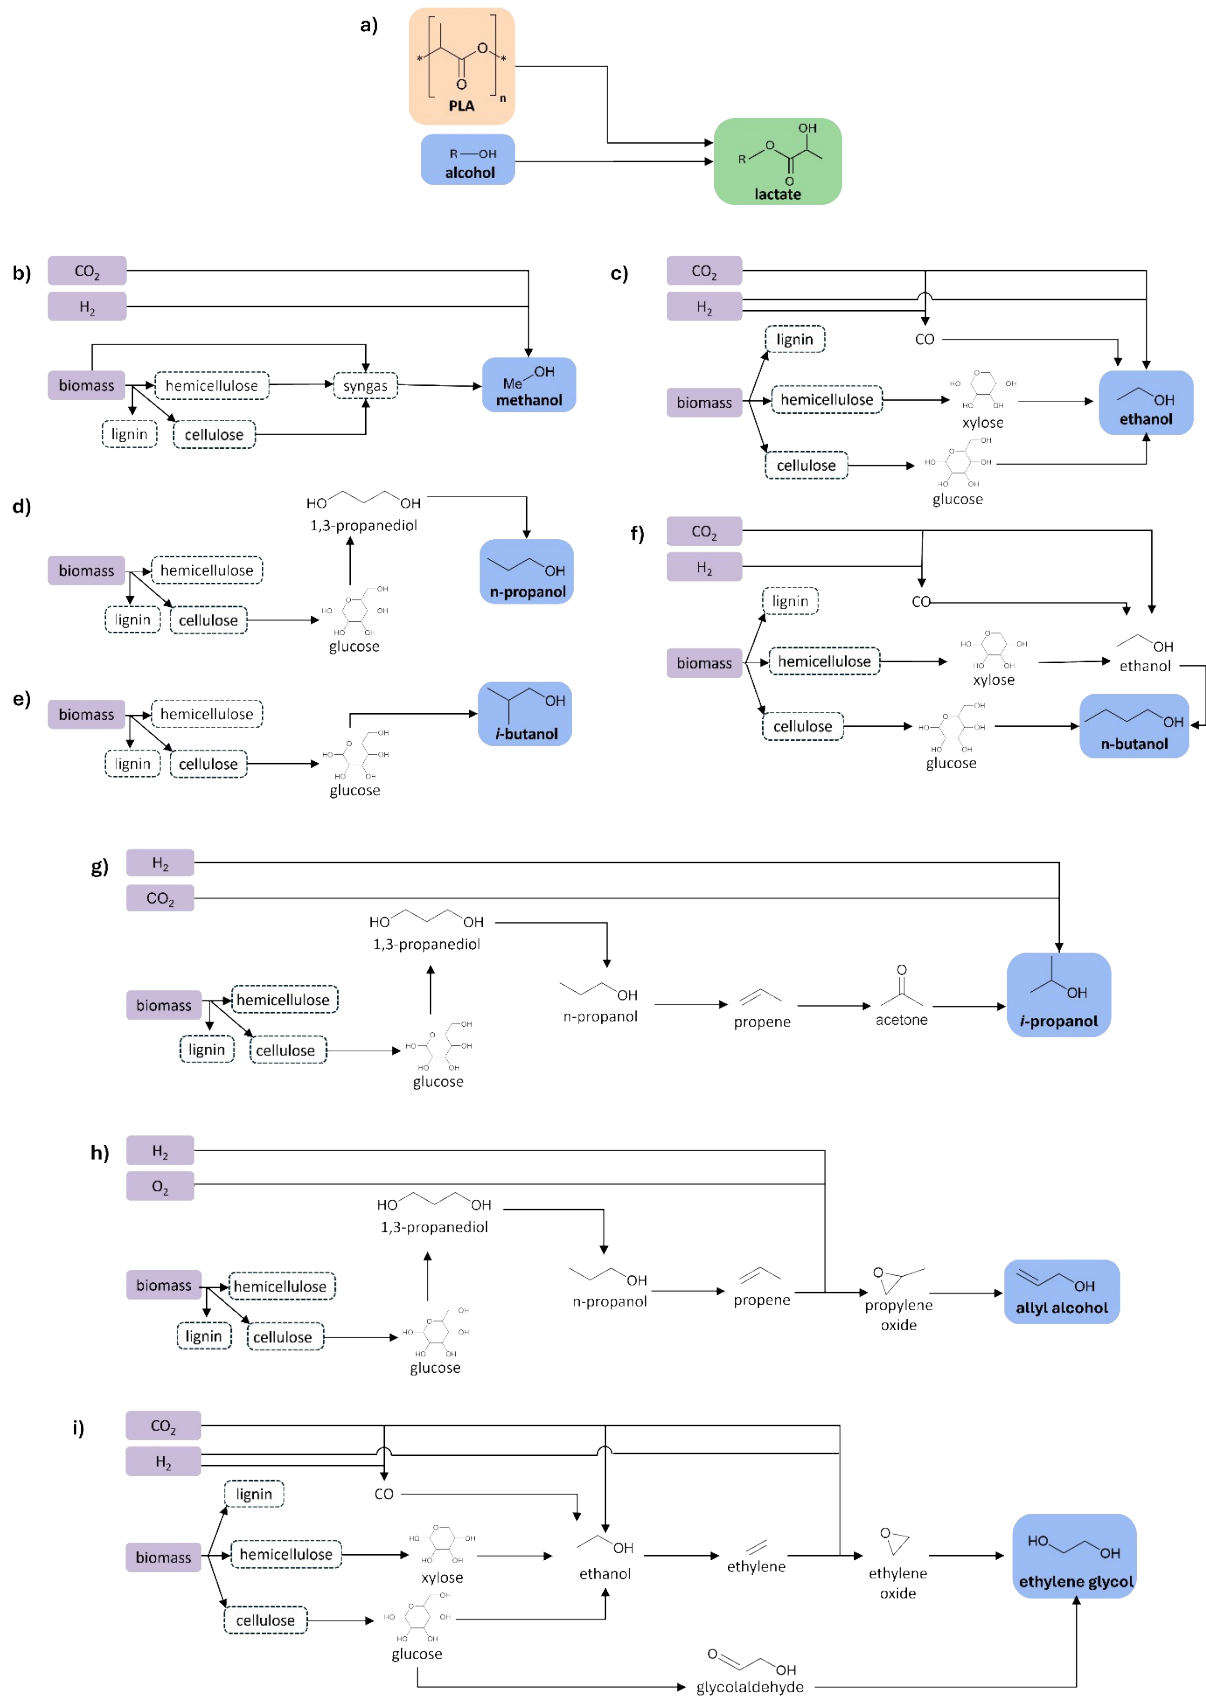

Scheme 2. Collection of all alternative and sequential pathways to produce the respective lactates from lignocellulosic biomass and renewable  $\text{CO}_2$  and  $\text{H}_2$ . Each of the points in the pareto front of Figure 5 corresponds to one or a combination of pathways.

## 9. Product library

Table S6 Product library

| Entry | Abbreviation  | Name                               | Sum<br>formular                               | SMILES           | InChI                                                    | Molecular Structure                                                                   | Reference |
|-------|---------------|------------------------------------|-----------------------------------------------|------------------|----------------------------------------------------------|---------------------------------------------------------------------------------------|-----------|
| 1     | MeLa          | methyl 2-hydroxypropanoate         | C <sub>4</sub> H <sub>8</sub> O <sub>3</sub>  | COC(C(C)O)=O     | InChI=1S/C4H8O3/c1-3(5)4(6)7-2/h3,5H,1-2H3               | 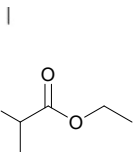   | [8]       |
| 2     | EtLa          | ethyl 2-hydroxypropanoate          | C <sub>5</sub> H <sub>10</sub> O <sub>3</sub> | CCOC(C(C)O)=O    | InChI=1S/C5H10O3/c1-3-8-5(7)4(2)6/h4,6H,3H2,1-2H3        |    | [8]       |
| 3     | EGLa          | 2-hydroxyethyl 2-hydroxypropanoate | C <sub>5</sub> H <sub>10</sub> O <sub>4</sub> | OC(C)C(OCCO)=O   | InChI=1S/C5H10O4/c1-4(7)5(8)9-3-2-6/h4,6-7H,2-3H2,1H3    |    | [11]      |
| 4     | PrLa          | propyl 2-hydroxypropanoate         | C <sub>6</sub> H <sub>12</sub> O <sub>3</sub> | CCCOC(C(C)O)=O   | InChI=1S/C6H12O3/c1-3-4-9-6(8)5(2)7/h5,7H,3-4H2,1-2H3    |    | [8]       |
| 5     | <i>i</i> PrLa | isopropyl 2-hydroxypropanoate      | C <sub>6</sub> H <sub>12</sub> O <sub>3</sub> | CC(C)OC(C(C)O)=O | InChI=1S/C6H12O3/c1-4(2)9-6(8)5(3)7/h4-5,7H,1-3H3        |   | [8]       |
| 6     | Alla          | allyl 2-hydroxypropanoate          | C <sub>6</sub> H <sub>10</sub> O <sub>3</sub> | C=CCOC(C(C)O)=O  | InChI=1S/C6H10O3/c1-3-4-9-6(8)5(2)7/h3,5,7H,1,4H2,2H3    |  | [11]      |
| 7     | BuLa          | butyl 2-hydroxypropanoate          | C <sub>7</sub> H <sub>14</sub> O <sub>3</sub> | OC(C)C(OCCCC)=O  | InChI=1S/C7H14O3/c1-3-4-5-10-7(9)6(2)8/h6,8H,3-5H2,1-2H3 |  | [8]       |

|    |                      |                                       |                                                |                         |                                                                         |                                                                                     |                                                                                       |
|----|----------------------|---------------------------------------|------------------------------------------------|-------------------------|-------------------------------------------------------------------------|-------------------------------------------------------------------------------------|---------------------------------------------------------------------------------------|
| 8  | <i>i</i> BuLa        | isobutyl 2-hydroxypropanoate          | C <sub>7</sub> H <sub>14</sub> O <sub>3</sub>  | CC(C)COC(C(C)O)=O       | InChI=1S/C7H14O3/c1-5(2)4-10-7(9)6(3)8/h5-6,8H,4H2,1-3H3                | 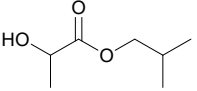 | [8]                                                                                   |
| 9  | PeLa                 | pentyl 2-hydroxypropanoate            | C <sub>8</sub> H <sub>16</sub> O <sub>3</sub>  | OC(C)C(OCCCC)=O         | InChI=1S/C8H16O3/c1-3-4-5-6-11-8(10)7(2)9/h7,9H,3-6H2,1-2H3             |  | [8]                                                                                   |
| 10 | HeLa                 | hexyl 2-hydroxypropanoate             | C <sub>9</sub> H <sub>18</sub> O <sub>3</sub>  | OC(C)C(OCCCCCC)=O       | InChI=1S/C9H18O3/c1-3-4-5-6-7-12-9(11)8(2)10/h8,10H,3-7H2,1-2H3         |  | [8]                                                                                   |
| 11 | Me <sub>2</sub> BuLa | 3,3-dimethylbutyl 2-hydroxypropanoate | C <sub>9</sub> H <sub>18</sub> O <sub>3</sub>  | O=C(C(O)C)OCCC(C)(C)C   | InChI=1S/C9H18O3/c1-7(10)8(11)12-6-5-9(2,3)4/h7,10H,5-6H2,1-4H3         |  | CAS number: 1856855-09-8 (racemate), 1847539-49-4 (S-isomer), 1841308-93-7 (L-isomer) |
| 12 | BnLa                 | benzyl 2-hydroxypropanoate            | C <sub>10</sub> H <sub>12</sub> O <sub>3</sub> | OC(C)C(OCC1=CC=CC=C1)=O | InChI=1S/C10H12O3/c1-8(11)10(12)13-7-9-5-3-2-4-6-9/h2-6,8,11H,7H2,1H3   |  | [18-19]                                                                               |
| 13 | OcLa                 | octyl 2-hydroxypropanoate             | C <sub>11</sub> H <sub>22</sub> O <sub>3</sub> | OC(C)C(OCCCCCCC)=O      | InChI=1S/C11H22O3/c1-3-4-5-6-7-8-9-14-11(13)10(2)12/h10,12H,3-9H2,1-2H3 |  | [8]                                                                                   |

## 10. References

- [1] H. Wittmann, A. Schorm, J. Sundermeyer, *Z. Anorg. Allg. Chem.* **2000**, *626*, 1583-1590.
- [2] O. Bienemann, R. Haase, U. Flörke, A. Döring, D. Kuckling, S. Herres-Pawlis, *Z. Naturforsch. B* **2010**, *65*, 798-806.
- [3] G. Malle, C. Blaise; X. Radisson, *L'Oreal EP 1 532 964 A1*, France, **2006**.
- [4] A. Hermann, S. Hill, A. Metz, J. Heck, A. Hoffmann, L. Hartmann, S. Herres-Pawlis, *Angew. Chem. Int. Ed. Engl.* **2020**, *59*, 21778-21784.
- [5] A. Hermann, T. Becker, M. A. Schafer, A. Hoffmann, S. Herres-Pawlis, *ChemSusChem* **2022**, *15*, e202201075.
- [6] P. McKeown, L. A. Roman-Ramirez, S. Bates, J. Wood, M. D. Jones, *ChemSusChem* **2019**, *12*, 5233-5238.
- [7] L. A. Román-Ramírez, P. McKeown, M. D. Jones, J. Wood, *ACS Catal.* **2018**, *9*, 409-416.
- [8] R. Petrus, D. Bykowski, P. Sobota, *ACS Catal.* **2016**, *6*, 5222-5235.
- [9] L. A. Román-Ramírez, M. Powders, P. McKeown, M. D. Jones, J. Wood, *Journal of Polymers and the Environment* **2020**, *28*, 2956-2964.
- [10] L. Burkart, A. Eith, A. Hoffmann, S. Herres-Pawlis, *Chem. Asian J.* **2023**, *18*, e202201195.
- [11] F. A. Leibfarth, N. Moreno, A. P. Hawker, J. D. Shand, *J. Polym. Sci.* **2012**, *50*, 4814-4822.
- [12] M. Fuchs, M. Walbeck, E. Jagla, A. Hoffmann, S. Herres-Pawlis, *ChemPlusChem* **2022**, *87*, e202200029.
- [13] H. Ohara, A. Onogi, M. Yamamoto, S. Kobayashi, *Biomacromolecules* **2010**, *11*, 2008-2015.
- [14] M. Puthumana, S. G. K. Palaniandavar, S. K. and Nayak, *Int. J. Polym. Anal. Charact.* **2020**, *25*, 82-93.
- [15] Y. Sathyam Reddy, P. Sujitha, C. G. Kumar, S. Kanjilal, P. Vijayalakshmi, *Journal of Surfactants and Detergents* **2016**, *19*, 343-351.
- [16] A. S. Makarov, M. Rueping, *Green Chemistry* **2025**, *27*, 716-721.
- [17] L. A. Roman-Ramirez, P. McKeown, M. D. Jones, J. Wood, *ACS Omega* **2020**, *5*, 5556-5564.
- [18] J. J. Monteith, S. A. L. Rousseaux, *Org. Lett.* **2021**, *23*, 9485-9489.
- [19] T. Becker, A. Hermann, N. Saritas, A. Hoffmann, S. Herres-Pawlis, *ChemSusChem* **2024**, *17*, e202400933.
- [20] P. Alagi, S. B. Nikam, K. Gopalsamy, L. Bashihab, G. Szekely, N. Hadjichristidis, *Angew. Chem., Int. Ed.* **2024**, *63*.
- [21] A. J. Spicer, A. Brandolese, A. P. Dove, *ACS Macro Lett.* **2024**, *13*, 189-194.
